# Supplementary material for: Location effects of vanadium in NiFe layered double hydroxides for oxygen evolution reaction
Source: Royal Society of Chemistry journal article supplement (doi:10.1039/d4ta03436h), 2024-01-01
Supplement: d4ta03436h1.pdf [file d4ta03436h1.pdf]

# Location effects of vanadium in NiFe layered double hydroxides for oxygen evolution reaction

Mengze Ma,<sup>a</sup> Yechi Zhang,<sup>a</sup> Xiaoqian Ding,<sup>a</sup> Jianlei Jing,<sup>a</sup> Linbo Jin,<sup>a</sup> Wei Liu,<sup>a</sup> Daojin Zhou<sup>\*a</sup> and Xiaoming Sun<sup>\*a</sup>

## Supporting Information

### Experimental Section

*Chemicals:* Fe(NO<sub>3</sub>)<sub>3</sub>·9H<sub>2</sub>O, Ni(NO<sub>3</sub>)<sub>2</sub>·6H<sub>2</sub>O, VCl<sub>3</sub>, Na<sub>2</sub>CO<sub>3</sub>, NaVO<sub>3</sub>, NaOH, KOH, deionized water, carbon paper, Ni foam, ethanol.

*Synthesis of CO<sub>3</sub><sup>2-</sup>-Ni<sub>2</sub>Fe<sub>1</sub>LDHs by co-precipitation method:* Ni(NO<sub>3</sub>)<sub>2</sub>·6H<sub>2</sub>O (2 mmol) and Fe(NO<sub>3</sub>)<sub>3</sub>·9H<sub>2</sub>O (1 mmol) were dissolved in 30 mL deionized water named mixture aqueous A. Na<sub>2</sub>CO<sub>3</sub> (0.6 g) and NaOH (0.6 g) were dissolved in 30 mL deionized water named mixture aqueous B. 30 mL deionized water in beaker C. Dropping A and B simultaneously into C, maintaining aqueous pH at 10.0. Then keep stirring for 20min. The obtained turbid liquid was centrifuged 5 times with water washing every time. The obtained gelatinous precipitate placed in vacuum freeze dryer for 24h.

The VO<sub>3</sub><sup>-</sup>-Ni<sub>2</sub>Fe<sub>1</sub>LDHs was synthesized by same method except for replacing NaCO<sub>3</sub> (0.6 g) with NaCO<sub>3</sub> (0.6 g) in aqueous B and bubbling N<sub>2</sub> in the whole reaction process.

*Synthesis of Ni<sub>2</sub>Fe<sub>x</sub>V<sub>(1-x)</sub>LDHs by co-precipitation method:* Ni(NO<sub>3</sub>)<sub>2</sub>·6H<sub>2</sub>O (2 mmol), Fe(NO<sub>3</sub>)<sub>3</sub>·9H<sub>2</sub>O (x mmol) and VCl<sub>3</sub> [(1-x) mmol] (x = 0.1, 0.3, 0.5, 0.7, 0.9) were dissolved in 30 mL deionized water named mixture aqueous A. NaOH (0.6g) was dissolved in 30 mL deionized water named mixture aqueous B. 30 mL deionized water in beaker C. Dropping A and B simultaneously into C, maintaining aqueous pH at 10.0 with N<sub>2</sub> bubbling. Then keep stirring for 12h with N<sub>2</sub> bubbling. The obtained turbid liquid was centrifuged 5 times with water washing every time. The obtained gelatinous precipitate placed in vacuum freeze dryer for 24h.

The VO<sub>3</sub><sup>-</sup>-Ni<sub>2</sub>Fe<sub>0.5</sub>V<sub>0.5</sub>LDHs was synthesized by same method except for adding NaVO<sub>3</sub> (0.6 g) in aqueous B.

*Electrochemical Measurements:* In order to evaluate the OER performance of the as-prepared sample in alkaline electrolyte, a standard three-electrode glass cell connected to an electrochemical workstation (CHI 660E, CH, Shanghai.) was used for testing, in which the platinum electrode was used as the counter electrode and the Hg/HgO electrode was used as the reference electrode. The durable test was conducted in two electrode system connected with battery testing system (CT-4008-5V10A, NEWARE, Shenzhen). The preparation method of working electrode: 5 mg powder sample was dispersed homogeneously with 1 mL ethanol in centrifuge tube, than adding 20 μL 5% Nafion aqueous as binder named catalyst ink. Dropping ink at 1 cm×1 cm Ni foam slowly. Since the redox peak of Ni/Fe is former than OER, which will disturb the OER onset potential, so the reverse sweep of cyclic voltammetry is adopted.

When we characterized the catalyst after stability test with Ni foam as substrate, it is difficult to get clear results due to the rough surface, so we replace Ni foam with carbon paper for the following test.

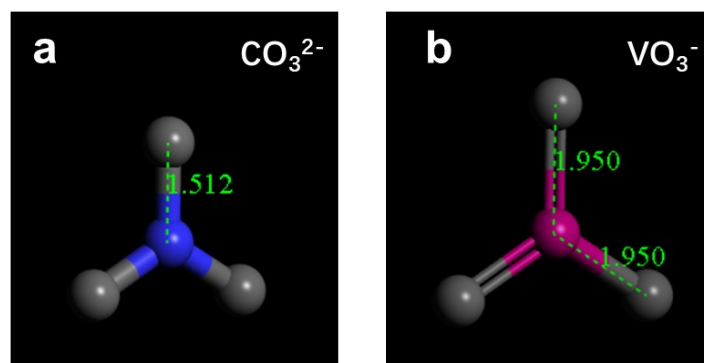

**Figure S1.** (a) and (b) Schematic diagram of anion structure of  $\text{CO}_3^{2-}$  and  $\text{VO}_3^-$ .

**Table S1.** Analytical results obtained by ICP-OES techniques of as-prepared  $\text{CO}_3^{2-}$ - $\text{Ni}_2\text{Fe}_1\text{LDHs}$  and  $\text{VO}_3^-$ - $\text{Ni}_2\text{Fe}_1\text{LDHs}$ .

|                                                          | Element | Mass fraction<br>W (%) |
|----------------------------------------------------------|---------|------------------------|
| $\text{VO}_3^-$ - $\text{Ni}_2\text{Fe}_1\text{LDHs}$    | Fe      | 15.030%                |
|                                                          | Ni      | 29.850%                |
|                                                          | V       | 9.812%                 |
| $\text{CO}_3^{2-}$ - $\text{Ni}_2\text{Fe}_1\text{LDHs}$ | Fe      | 17.787%                |
|                                                          | Ni      | 35.385%                |
|                                                          | V       | <0.005                 |

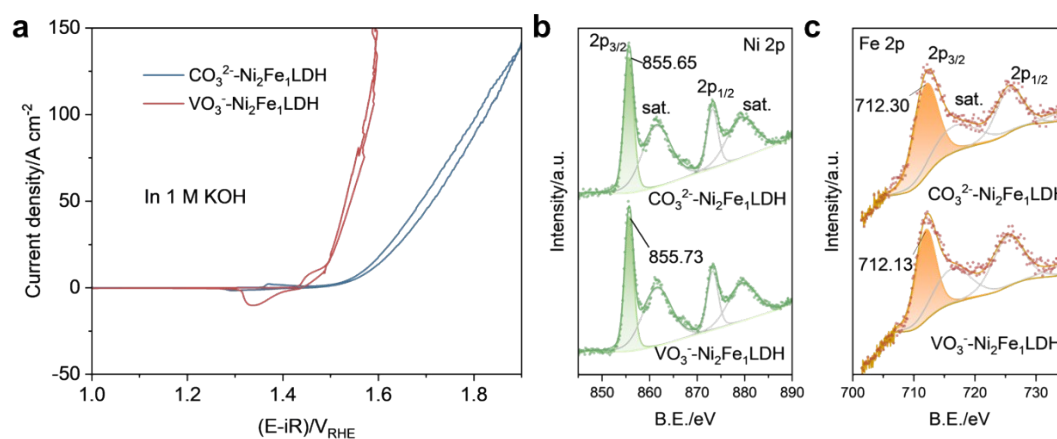

**Figure S2.** (a) Polarization curves of  $\text{CO}_3^{2-}$ - $\text{Ni}_2\text{Fe}_1\text{LDHs}$  and  $\text{VO}_3^-$ - $\text{Ni}_2\text{Fe}_1\text{LDHs}$  tested in 1 M KOH, three electrode, XPS spectra of (b) Ni 2p and (c) Fe 2p and peak fitting analysis of  $\text{CO}_3^{2-}$ - $\text{Ni}_2\text{Fe}_1\text{LDHs}$  and  $\text{VO}_3^-$ - $\text{Ni}_2\text{Fe}_1\text{LDHs}$ .

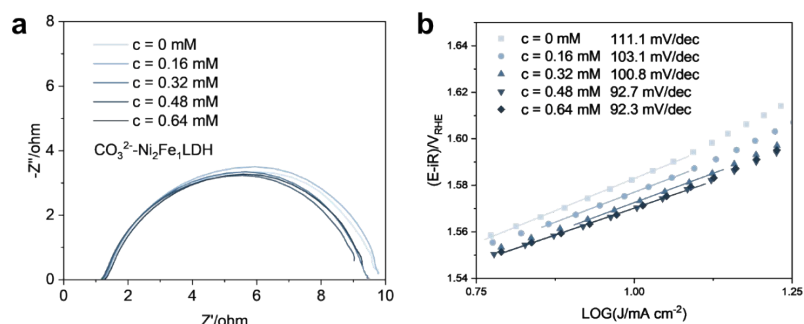

**Figure S3.** (a) and (b) EIS and Tafel slope of  $\text{CO}_3^{2-}\text{-Ni}_2\text{Fe}_1\text{LDH}$ s in 1 M KOH + c mM  $\text{NaVO}_3$ , respectively, EIS is tested at 0.6  $V_{\text{Hg/HgO}}$ .

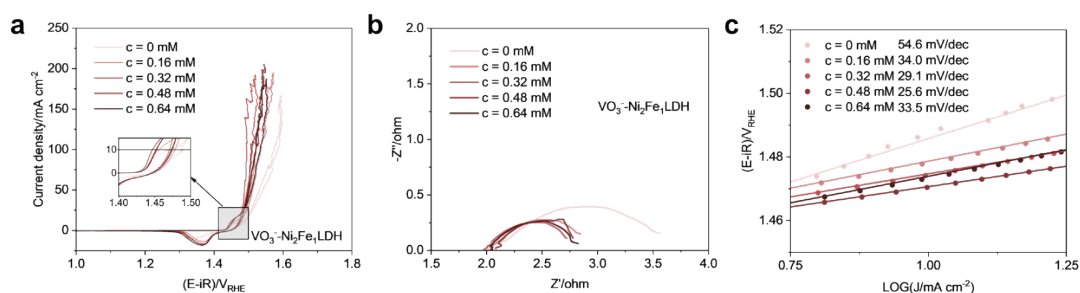

**Figure S4.** (a), (b) and (c) Cyclic Voltammetry, EIS and Tafel slope of  $\text{VO}_3\text{-NiFe LDH}$ s in 1 M KOH + c mM  $\text{NaVO}_3$ , respectively, scan rate of CV is 5 mV/s, EIS is tested at 0.6  $V_{\text{Hg/HgO}}$ .

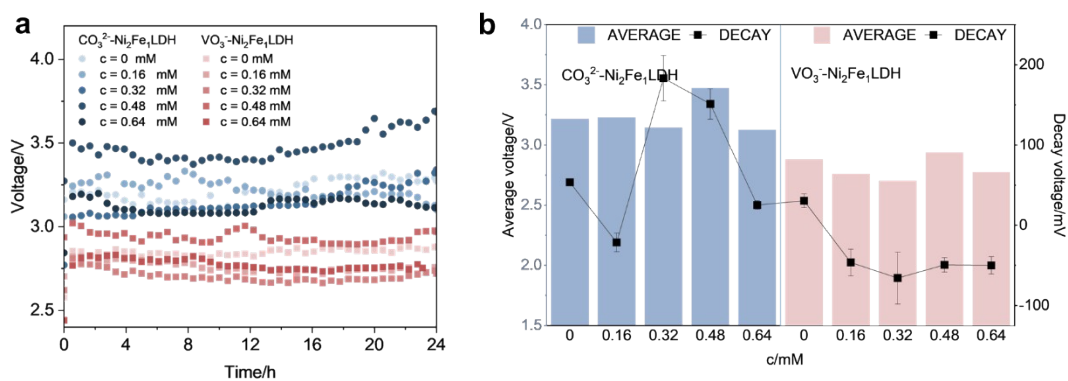

**Figure S5.** (a) Long-term stability data of  $\text{CO}_3^{2-}\text{-Ni}_2\text{Fe}_1\text{LDH}$ s and  $\text{VO}_3\text{-NiFe LDH}$ s (400  $\text{mA}/\text{cm}^2$ , 80°C, 24h) and (b) corresponding average voltage and decay voltage (with error bar tested 3 times, the same below).

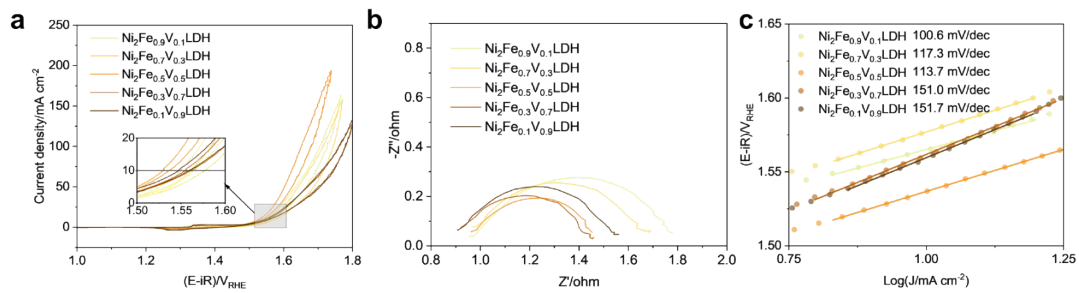

**Figure S6.** (a), (b) and (c) Cyclic Voltammetry, EIS and Tafel slope of  $\text{Ni}_2\text{Fe}_x\text{V}_{(1-x)}\text{LDHs}$  in 1 M KOH, respectively, scan rate of CV is 5 mV/s, EIS is tested at 0.6  $V_{\text{Hg/HgO}}$ .

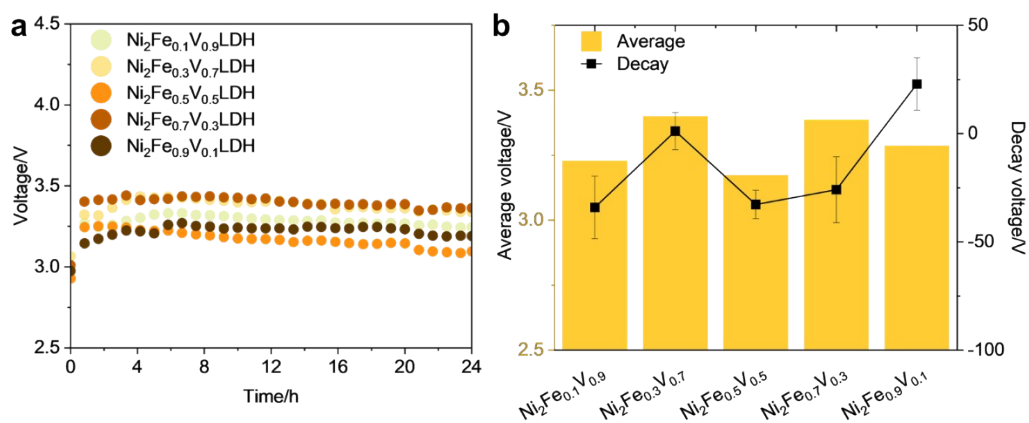

**Figure S7.** (a) Long-term stability curves of  $\text{Ni}_2\text{Fe}_x\text{V}_{(1-x)}\text{LDHs}$  (400  $\text{mA}/\text{cm}^2$ , 80°C, 24h) and (b) corresponding average voltage and decay voltage.

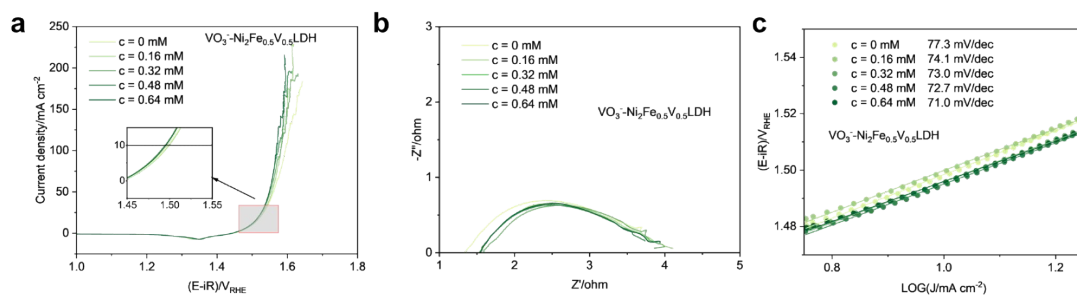

**Figure S8.** (a), (b) and (c) Cyclic Voltammetry (CV), EIS and Tafel slope of  $\text{VO}_3\text{-Ni}_2\text{Fe}_{0.5}\text{V}_{0.5}\text{LDHs}$  in 1 M KOH + c mM  $\text{NaVO}_3$ , respectively, scan rate of CV is 5 mV/s, EIS is tested at 0.6  $V_{\text{Hg/HgO}}$ .

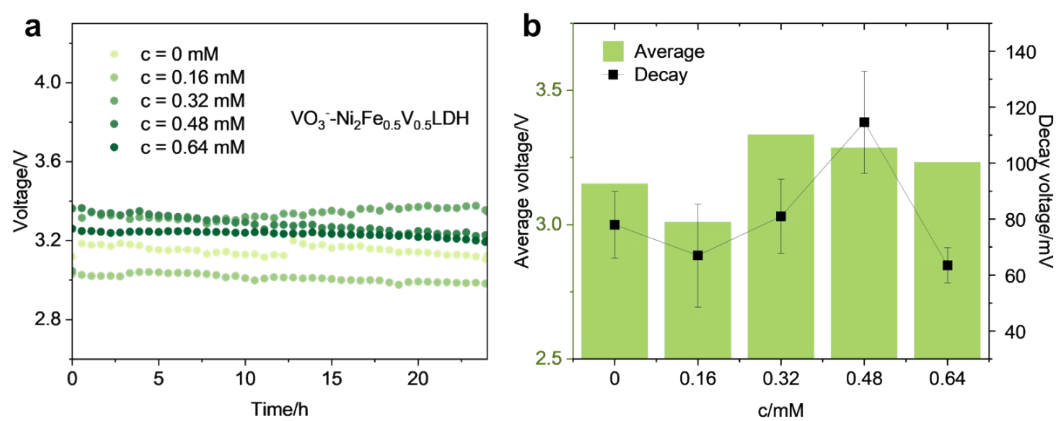

**Figure S9.** (a) Long-term stability curves of  $\text{VO}_3\text{-Ni}_2\text{Fe}_{0.5}\text{V}_{0.5}\text{LDH}$ s in 1 M KOH + c mM  $\text{NaVO}_3$  ( $400 \text{ mA/cm}^2$ ,  $80^\circ\text{C}$ , 24h) and (b) corresponding average voltage and decay voltage.

**Table S2.** Summary data of the activity and stability of eight NiFe-based LDHs with different electrolytes.

|                                                                                    | Concentration of<br>NaVO <sub>3</sub> in 1 M<br>KOH/mM | $\eta_{10\text{mA}}$<br>/V <sub>RHE</sub> | Tafel slope<br>/mV dec <sup>-1</sup> | Average<br>voltage/V | Decay<br>voltage/mV |
|------------------------------------------------------------------------------------|--------------------------------------------------------|-------------------------------------------|--------------------------------------|----------------------|---------------------|
| <b>CO<sub>3</sub><sup>2-</sup>-Ni<sub>2</sub>Fe<sub>1</sub>LDH</b>                 | 0                                                      | 353                                       | 111.1                                | 3.21628              | 53.46667            |
|                                                                                    | 0.16                                                   | 347                                       | 103.1                                | 3.22863              | -21.43333           |
|                                                                                    | 0.32                                                   | 342                                       | 100.8                                | 3.14534              | 183.2               |
|                                                                                    | 0.48                                                   | 340                                       | 92.7                                 | 3.47284              | 151.1               |
|                                                                                    | 0.64                                                   | 340                                       | 92.3                                 | 3.12622              | 25.2                |
| <b>VO<sub>3</sub><sup>-</sup>-Ni<sub>2</sub>Fe<sub>1</sub>LDH</b>                  | 0                                                      | 258                                       | 54.6                                 | 2.88                 | 30.46667            |
|                                                                                    | 0.16                                                   | 248                                       | 34.0                                 | 2.76035              | -46.46667           |
|                                                                                    | 0.32                                                   | 234                                       | 29.1                                 | 2.70305              | -65.86667           |
|                                                                                    | 0.48                                                   | 244                                       | 25.6                                 | 2.93823              | -49.36667           |
|                                                                                    | 0.64                                                   | 243                                       | 33.5                                 | 2.7748               | -49.96667           |
| <b>Ni<sub>2</sub>Fe<sub>0.9</sub>V<sub>0.1</sub>LDH</b>                            | 0                                                      | 335                                       | 100.6                                | 3.286                | -34.1               |
| <b>Ni<sub>2</sub>Fe<sub>0.7</sub>V<sub>0.3</sub>LDH</b>                            | 0                                                      | 347                                       | 117.3                                | 3.386                | 1.1                 |
| <b>Ni<sub>2</sub>Fe<sub>0.5</sub>V<sub>0.5</sub>LDH</b>                            | 0                                                      | 306                                       | 113.7                                | 3.173                | -32.7               |
| <b>Ni<sub>2</sub>Fe<sub>0.3</sub>V<sub>0.7</sub>LDH</b>                            | 0                                                      | 331                                       | 151.0                                | 3.399                | -25.9               |
| <b>Ni<sub>2</sub>Fe<sub>0.1</sub>V<sub>0.9</sub>LDH</b>                            | 0                                                      | 329                                       | 151.7                                | 3.228                | 22.9                |
| <b>VO<sub>3</sub><sup>-</sup>-Ni<sub>2</sub>Fe<sub>0.5</sub>V<sub>0.5</sub>LDH</b> | 0                                                      | 268                                       | 77.3                                 | 3.153                | 77.96667            |
|                                                                                    | 0.16                                                   | 269                                       | 74.1                                 | 3.010                | 67                  |
|                                                                                    | 0.32                                                   | 265                                       | 73.0                                 | 3.335                | 81                  |
|                                                                                    | 0.48                                                   | 266                                       | 72.7                                 | 3.286                | 114.6               |
|                                                                                    | 0.64                                                   | 264                                       | 71.0                                 | 3.233                | 63.46667            |

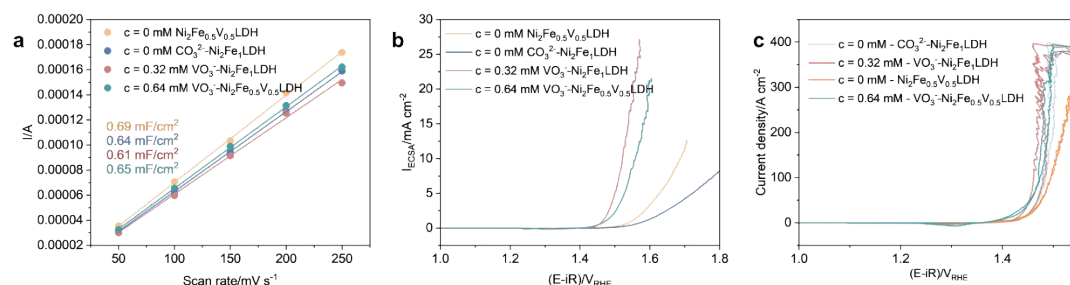

**Figure S10.** (a) The corresponding plots of current vs. scanning rate at voltage range from -0.1V to 0 V<sub>Hg/HgO</sub> and calculated  $C_{\text{dl}}$ , (b) LSV curves after ECSA normalization ( $I_{\text{ECSA}} = I/(C_{\text{dl}}/0.06)$ ), (c) CV curves tested at 80°C.

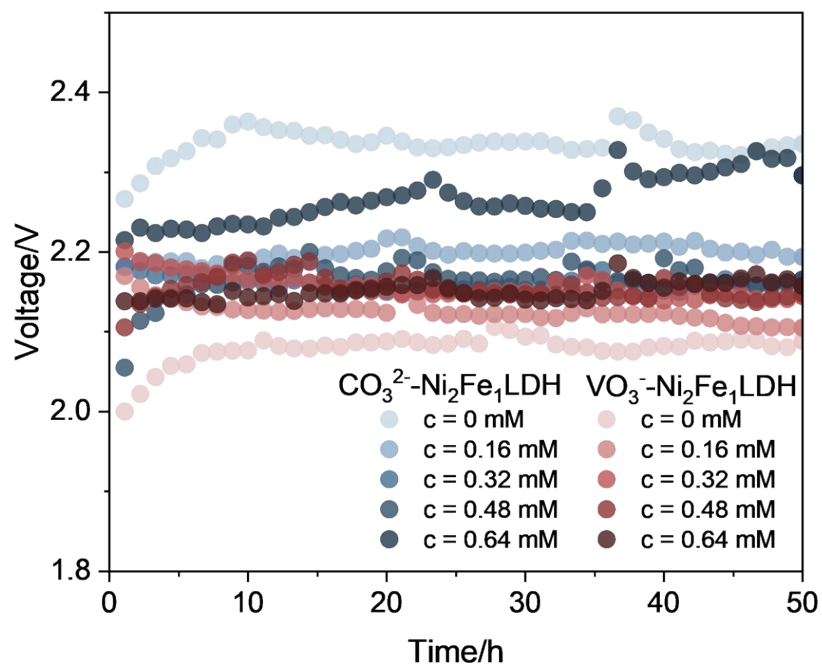

**Figure S11.** Long-term stability test of  $\text{CO}_3^{2-}\text{-Ni}_2\text{Fe}_1\text{LDH}$ s and  $\text{VO}_3^-\text{-NiFe LDH}$ s in 1 M KOH + c mM  $\text{NaVO}_3$ . The substrate of catalyst is carbon paper.

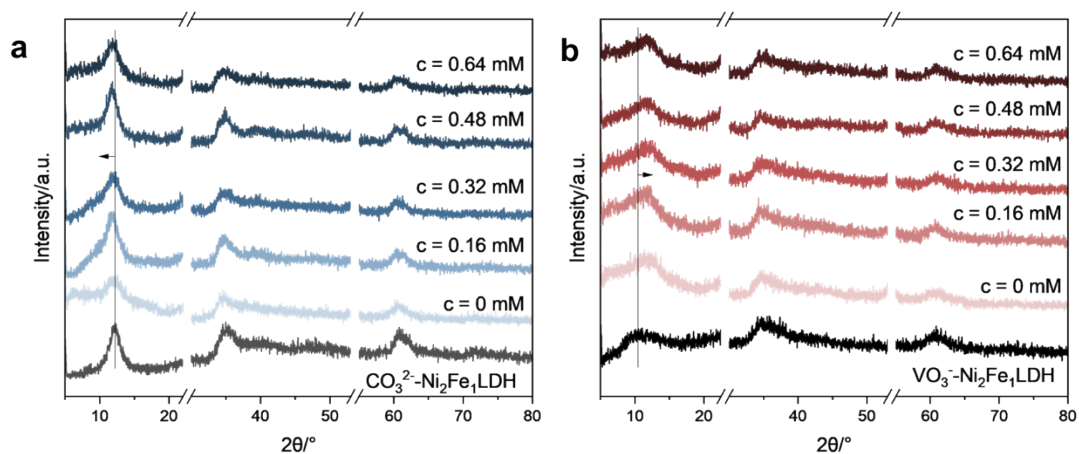

**Figure S12.** (a) and (b) the XRD patterns of  $\text{CO}_3^{2-}\text{-Ni}_2\text{Fe}_1\text{LDH}$ s and  $\text{VO}_3^-\text{-NiFe LDH}$ s before (bottom line) and after stability test (50 mA/cm<sup>2</sup>, 50 h, room temperature) in 1 M KOH + c mM  $\text{NaVO}_3$ .

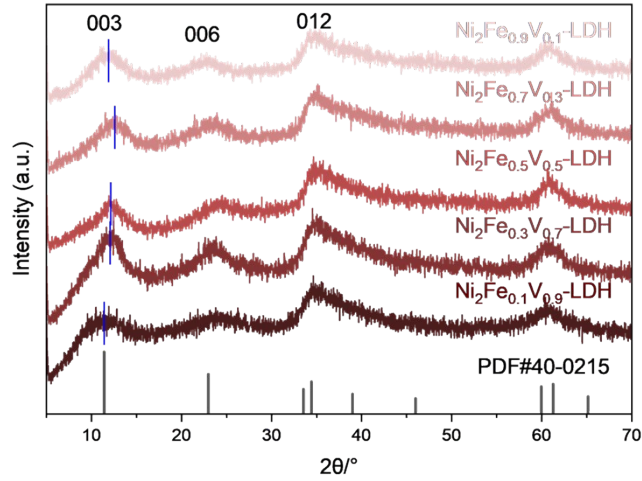

**Figure S13.** XRD pattern of  $\text{Ni}_2\text{Fe}_x\text{V}_{(1-x)}\text{LDHs}$ .

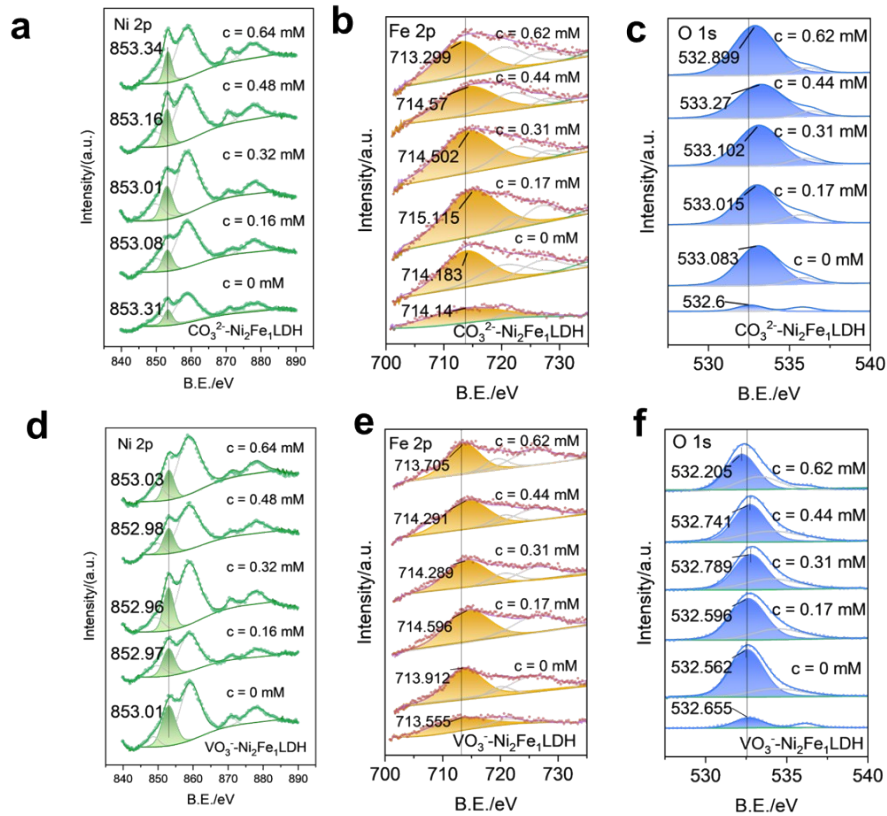

**Figure S14.** (a), (b), (c) XPS spectra for Ni 2p, Fe 2p, O 1s of  $\text{CO}_3^{2-}\text{-Ni}_2\text{Fe}_1\text{LDHs}$  before and after stability test (50mA/cm<sup>2</sup>, 50h, room temperature) in 1 M KOH + c mM  $\text{NaVO}_3$ , (d), (e), (f) XPS spectra for Ni 2p, Fe 2p, O 1s of  $\text{VO}_3\text{-Ni}_2\text{Fe}_1\text{LDHs}$  before and after stability test (50mA/cm<sup>2</sup>, 50h, room temperature) in 1 M KOH + c mM  $\text{NaVO}_3$ .



**Table S3.** Raman shifts of nickel oxides and hydroxides.<sup>[1]</sup>

| Compounds                     | Raman Shift/cm <sup>-1</sup> |                   |                                    |             |
|-------------------------------|------------------------------|-------------------|------------------------------------|-------------|
|                               | Ni-OH lattice mode           | Ni-O lattice mode | 2 <sup>nd</sup> order lattice mode | O-H stretch |
| $\alpha$ -Ni(OH) <sub>2</sub> | 460                          | 495               | 935, 1075                          | 3647        |
| $\beta$ -Ni(OH) <sub>2</sub>  | 306-319                      | 445-458           | 508-519                            | 3581        |
| $\gamma$ -NiOOH               | 477                          |                   | 557                                |             |
| $\beta$ -NiOOH                | 492                          |                   | 557                                |             |

[1] a) B. C. Cornilsen, X. Y. Shan, P. L. Loyselle, *J. Power Sources*. **1990**, 29, 453.

b) W. Lai, L. H. Ge, H. M. Li, Y. L. Deng, B. Xu, B. Ouyang, E. Kan, *Int. J. Hydrogen Energy*. **2021**, 46, 26861.
